# Supplementary material for: Effect of the Concomitant Use of Subcutaneous Basal Insulin and Intravenous Insulin Infusion in the Treatment of Severe Hyperglycemic Patients
Source: PubMed Central journal article supplement — Endocrinol Metab (Seoul). 2022 Jun 3;37(3):444–54. doi: 10.3803/EnM.2021.1341 (PMC9262694; doi:10.3803/enm.2021.1341), 2022-06-03
Supplement: enm-2021-1341-suppl5.pdf [file enm-2021-1341-suppl5.pdf]

**Supplemental Table S5.** Comparison of the Incidence of Rebound Hyperglycemia by Group: Subgroup Analysis

| Variable                                                     | Non-DKA or HHS ( <i>n</i> =42) |                     | DKA or HHS ( <i>n</i> =123) |                    |
|--------------------------------------------------------------|--------------------------------|---------------------|-----------------------------|--------------------|
|                                                              | Odds ratio (95% CI)            | <i>P</i> value      | Odds ratio (95% CI)         | <i>P</i> value     |
| Univariable                                                  |                                |                     |                             |                    |
| Group <sup>a</sup>                                           | 0.059 (0.01–0.29)              | <0.001 <sup>b</sup> |                             |                    |
| Multivariable                                                |                                |                     |                             |                    |
| Group <sup>a</sup>                                           | 0.06 (0.01–0.66)               | 0.021 <sup>b</sup>  | 0.20 (0.06–0.62)            | 0.005 <sup>b</sup> |
| Age                                                          | 1.00 (0.95–1.06)               | 0.869               | 0.98 (0.95–1.01)            | 0.138              |
| Body mass index, kg/m <sup>2</sup>                           | –                              | –                   | 1.16 (1.00–1.35)            | 0.057              |
| Dose of basal insulin, U                                     | –                              | –                   | 1.07 (0.94–1.21)            | 0.328              |
| Duration of CIII, hr                                         | –                              | –                   | 0.97 (0.95–0.99)            | 0.006 <sup>b</sup> |
| Glucose level immediately before CIII discontinuation, mg/dL | 1.02 (0.99–1.04)               | 0.253               | 1.02 (1.00–1.03)            | 0.027 <sup>b</sup> |
| Duration of DM, yr                                           | 0.95 (0.84–1.06)               | 0.327               | 1.03 (0.97–1.09)            | 0.388              |
| Precipitating factor                                         | –                              | –                   | 3.57 (1.09–11.76)           | 0.036 <sup>b</sup> |
| DPP4 inhibitor                                               | –                              | –                   | 0.39 (0.12–1.27)            | 0.117              |

Subgroup was set as DKA/HHS group vs. non-DKA/HHS group.

DKA, diabetic ketoacidosis; HHS, hyperosmolar hyperglycemic state; CI, confidence interval; CIII, continuous intravenous insulin infusion; DM, diabetes mellitus; DPP4, dipeptidyl peptidase 4.

<sup>a</sup>Early vs. delayed basal insulin group; <sup>b</sup>Values are statistically significant ( $P < 0.05$ ) multiple logistic regression models using backward stepwise analyses.
